# Supplementary material for: NFATC3 promotes IRF7 transcriptional activity in plasmacy­­toid dendritic cells
Source: PubMed Central journal article supplement — J Exp Med. 2016 Oct 17;213(11):2383–98. doi: 10.1084/jem.20160438 (PMC5068237; doi:10.1084/jem.20160438), 2016-10-17
Supplement: JEM_20160438_sm.pdf [file JEM_20160438_sm.pdf]

SUPPLEMENTAL MATERIAL

Bao et al., <http://dx.doi.org/10.1084/jem.20160438>

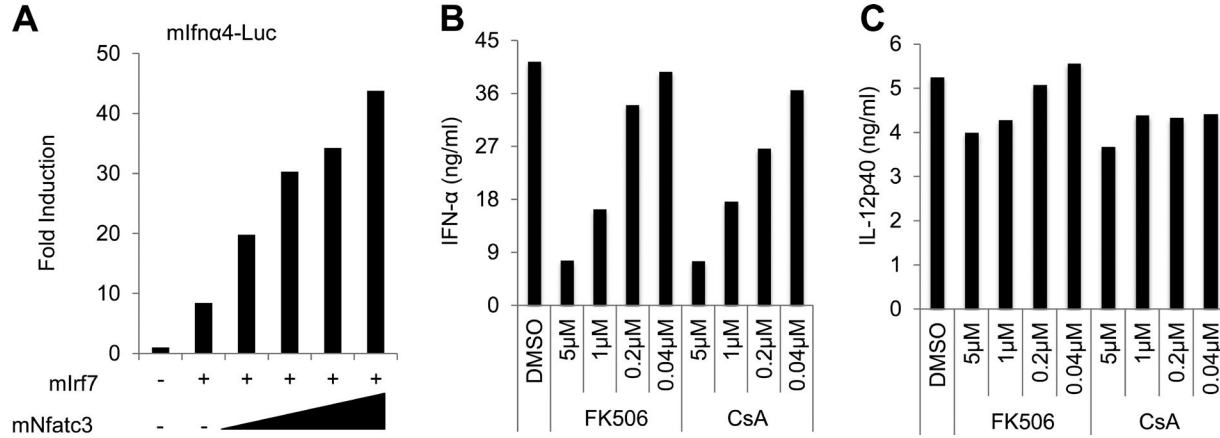

Figure S1. **Mouse Nfatc3 enhances mouse Ifn- $\alpha$ 4 transcriptional activity, and inhibition of Nfatc3 reduces CpG DNA-induced IFN- $\alpha$  in mouse primary pDCs.** (A) HEK-293T cells were transfected with 100 ng mouse IFNA4 luciferase reporter plasmid (mlfna4-Luc) and 0.5 ng mouse Irf7 expression vector together with an increasing amount of mouse NFATC3 expression vector (25, 50, and 100 ng). 0.1 ng renilla luciferase reporter plasmid was transfected simultaneously as an internal control. Results are presented as fold induction relative to the activity of renilla luciferase. (B and C) ELISA of the production of IFN- $\alpha$  and IL-12p40 by mouse bone marrow pDCs stimulated with 1  $\mu$ M CpG A for 24 h together with FK506, Cs A, or vehicle (DMSO). Data are representative of two independent experiments.

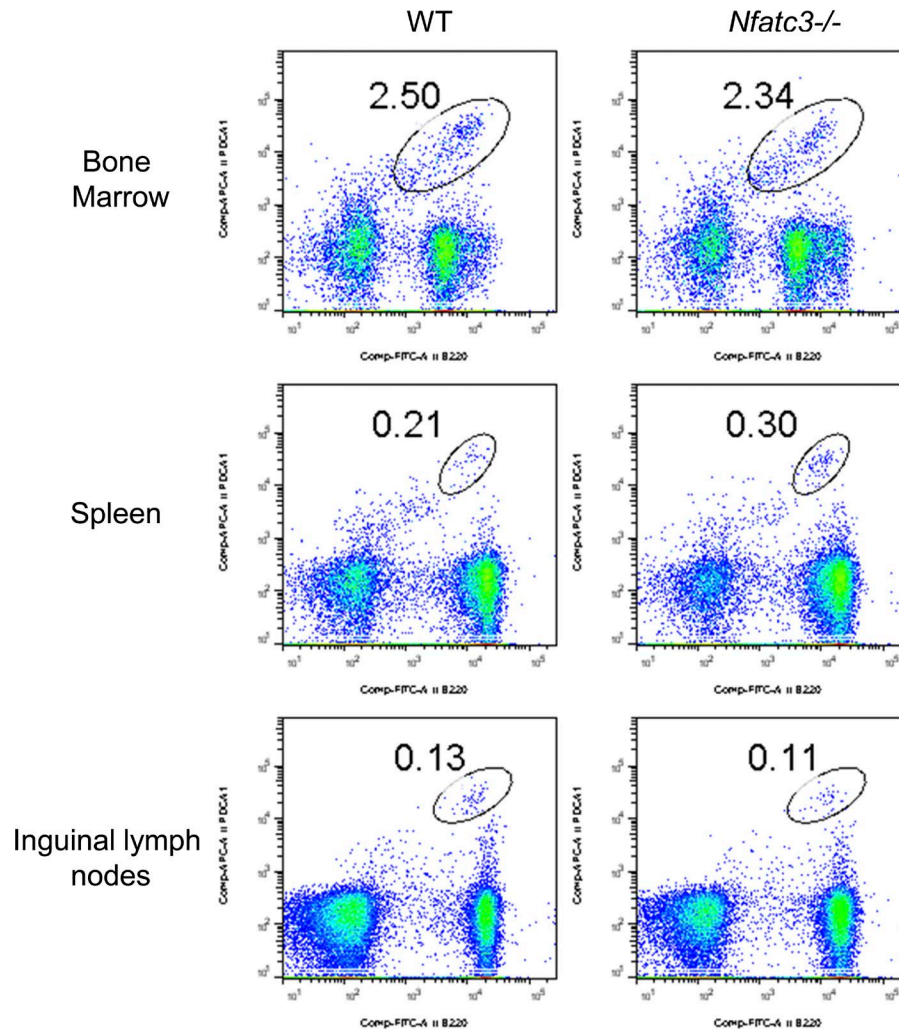

Figure S2. ***Nfatc3* deficiency does not affect pDC differentiation.** Total bone marrow cells, splenocytes, and inguinal lymphocytes were isolated. pDC (B220<sup>+</sup>PDCA1<sup>+</sup>) frequencies were analyzed by FACS.

Table S1. Primers used for real-time PCR

| Gene          | Sequence (5'-3')       |
|---------------|------------------------|
| Ifna1 forward | TCAGTCTTCCCAGCACATTG   |
| Ifna1 reverse | GAGAAGAAACACAGCCCTG    |
| Ifna2 forward | CATTCCAAGCAGCAGATGAA   |
| Ifna2 reverse | AGCAGATCCAGAAGGCTCAA   |
| Ifna4 forward | TATGTCCTCACAGCCAGCAG   |
| Ifna4 reverse | TTCTGCAATGACCTCCATCA   |
| Ifna5 forward | TGACCTCAAAGCCTGTGTGATG |
| Ifna5 reverse | AAGTATTTCTCACAGCCAGCAG |
| Ifna6 forward | TCAGGGGAAGTGCTGTATC    |
| Ifna6 reverse | TGGAATGCAACCCCTCTAGA   |
| Ifnb1 forward | AGCTCCAAGAAAGGACGAACAT |
| Ifnb1 reverse | GCCCTGTAGGTGAGTTGATCT  |
| Irf7 forward  | ACAGCACAGGCGTTTTATC    |
| Irf7 reverse  | TCCCGGCTAAGTTCGTACAC   |
| Il12a forward | GCTTCTCCACAGGAGGTTT    |
| Il12a reverse | CTAGACAAGGCATGCTGGT    |
| Actb forward  | GATCATTGCTCCTCCTGAGC   |
| Actb reverse  | ACATCTGCTGGAAGGTGGAC   |

Table S2. Biotin-labeled oligonucleotides used for pull-down assay

| Promoter            | Sequence (5'-3')                                                   |
|---------------------|--------------------------------------------------------------------|
| Bio-IFNA1 forward   | /5'Biotin/GAAAGCAAAAACAGAAATGGAAAGTGGCCAGAACATTAAAGAAAGTGGAAATCAG  |
| Bio-IFNA1 reverse   | /5'Biotin/CTGATTTCCACTTTCTTAATGCTTCTGGCCACTTCCATTCTGTTTTGCTTTC     |
| Bio-IFNA2 forward   | /5'Biotin/GAAAGCAAAAAGAGAAGTAGAAAGTAACACAGGGCATTGGAAAAATGT         |
| Bio-IFNA2 reverse   | /5'Biotin/ACATTTTCCAAATGCCCTGTGTTACTTTCTACTTCTCTTTTTGCTTTC         |
| Bio-IFNA6 forward   | /5'Biotin/GAAAGCAAAAATCAGACGTAGAAAGTAAATTCTGAAAATGAAAACCTAG        |
| Bio-IFNA6 reverse   | /5'Biotin/CTAGTTTCCATTTTCAGAATTTACTTTCTACGTCTGATTTTGCTTTC          |
| Bio-IFNA13 forward  | /5'Biotin/GAAAGCAAAAACAGAAATGGAAAGTGGTCCAGAACATTAAAGAAAGTGGAAATCAG |
| Bio-IFNA13 reverse  | /5'Biotin/CTGATTTCCACTTTCTTAATGCTTCTGGACCACTTCCATTCTGTTTTGCTTTC    |
| Bio-IFNB1 forward   | /5'Biotin/ACATAGGAAAACCTGAAAGGGAGAAGTGAAGTGGGAAATTCCTCTG           |
| Bio-IFNB1 reverse   | /5'Biotin/CAGAGGAATTTCCCCTTTCACTTCTCCCTTTCAGTTTTCTATGT             |
| Bio-control forward | /5'Biotin/CTAAGCAAAAACAGAGATACTAAGTACAACCTAGGAATTTAGAAAATCCTTATTAG |
| Bio-control reverse | /5'Biotin/CTAATAAGGATTTTCTAAATCCCTAGTTGTACTTAGTATCTCTGTTTTGCTTAG   |
